# Supplementary material for: Tae-miR396b regulates TaGRFs in spikes of three wheat spike mutants
Source: PeerJ. 2024 Nov 22;12:e18550. doi: 10.7717/peerj.18550 (PMC11587873; doi:10.7717/peerj.18550)
Supplement: Supplemental Information 2 [file peerj-12-18550-s002.xlsx]

## Sheet: psRNATargetJob-1684137875719854
Table S2. Target gene prediction results of tae-miR396b
miRNA_Acc.	Target_Acc.	Expectation	UPE$	miRNA_start	miRNA_end	Target_start	Target_end	miRNA_aligned_fragment	alignment	Target_aligned_fragment	Inhibition	Target_Desc.	Multiplicity
tae-miR396b	TraesCS6B01G110900.1	1.5	-1	1	21	607	627	UUCCACAGCUUUCUUGAACUU	:: ::::::.:::::::::	GCGUACAAGAAGGCUGUGGAA	Cleavage	cdna chromosome:IWGSC:6B:93101928:93104338:1 gene:TraesCS6B01G110900 gene_biotype:protein_coding transcript_biotype:protein_coding	1
tae-miR396b	TraesCS1A01G017600.1	2	-1	1	21	223	243	UUCCACAGCUUUCUUGAACUU	:::::::.:::: ::::::	GUGUUCAAGGAAGCAGUGGAA	Cleavage	cdna chromosome:IWGSC:1A:9220029:9221666:-1 gene:TraesCS1A01G017600 gene_biotype:protein_coding transcript_biotype:protein_coding	1
tae-miR396b	TraesCS2D01G010900.1	2	-1	1	21	1834	1854	UUCCACAGCUUUCUUGAACUU	:::::::::: .:::::::	GUGUUCAAGAAAAUUGUGGAA	Cleavage	cdna chromosome:IWGSC:2D:5389244:5392105:1 gene:TraesCS2D01G010900 gene_biotype:protein_coding transcript_biotype:protein_coding	1
tae-miR396b	TraesCS2A01G181600.1	2.5	-1	1	21	678	698	UUCCACAGCUUUCUUGAACUU	.:::::: :.:.::::::::.	GAGUUCAUGGAGGCUGUGGAG	Cleavage	cdna chromosome:IWGSC:2A:140579603:140580355:-1 gene:TraesCS2A01G181600 gene_biotype:protein_coding transcript_biotype:protein_coding	1
tae-miR396b	TraesCS1B01G007800.3	2.5	-1	1	21	247	267	UUCCACAGCUUUCUUGAACUU	.:::.::::.::::::::.	CGGUUUAAGAGAGCUGUGGGC	Cleavage	cdna chromosome:IWGSC:1B:4320651:4326770:-1 gene:TraesCS1B01G007800 gene_biotype:protein_coding transcript_biotype:protein_coding	1
tae-miR396b	TraesCS1A01G005600.1	2.5	-1	1	21	247	267	UUCCACAGCUUUCUUGAACUU	.:::.::::.::::::::.	CGGUUUAAGAGAGCUGUGGGC	Cleavage	cdna chromosome:IWGSC:1A:3256076:3262305:-1 gene:TraesCS1A01G005600 gene_biotype:protein_coding transcript_biotype:protein_coding	1
tae-miR396b	TraesCS1D01G002300.3	2.5	-1	1	21	247	267	UUCCACAGCUUUCUUGAACUU	.:::.::::.::::::::.	CGGUUUAAGAGAGCUGUGGGC	Cleavage	cdna chromosome:IWGSC:1D:548457:554361:-1 gene:TraesCS1D01G002300 gene_biotype:protein_coding transcript_biotype:protein_coding	1
tae-miR396b	TraesCS1B01G007800.1	2.5	-1	1	21	247	267	UUCCACAGCUUUCUUGAACUU	.:::.::::.::::::::.	CGGUUUAAGAGAGCUGUGGGC	Cleavage	cdna chromosome:IWGSC:1B:4320651:4326770:-1 gene:TraesCS1B01G007800 gene_biotype:protein_coding transcript_biotype:protein_coding	1
tae-miR396b	TraesCS1A01G005600.2	2.5	-1	1	21	247	267	UUCCACAGCUUUCUUGAACUU	.:::.::::.::::::::.	CGGUUUAAGAGAGCUGUGGGC	Cleavage	cdna chromosome:IWGSC:1A:3256076:3262305:-1 gene:TraesCS1A01G005600 gene_biotype:protein_coding transcript_biotype:protein_coding	1
tae-miR396b	TraesCS1A01G005600.6	2.5	-1	1	21	247	267	UUCCACAGCUUUCUUGAACUU	.:::.::::.::::::::.	CGGUUUAAGAGAGCUGUGGGC	Cleavage	cdna chromosome:IWGSC:1A:3256076:3262305:-1 gene:TraesCS1A01G005600 gene_biotype:protein_coding transcript_biotype:protein_coding	1
tae-miR396b	TraesCS1A01G005600.4	2.5	-1	1	21	247	267	UUCCACAGCUUUCUUGAACUU	.:::.::::.::::::::.	CGGUUUAAGAGAGCUGUGGGC	Cleavage	cdna chromosome:IWGSC:1A:3256076:3262305:-1 gene:TraesCS1A01G005600 gene_biotype:protein_coding transcript_biotype:protein_coding	1
tae-miR396b	TraesCS1A01G005600.5	2.5	-1	1	21	247	267	UUCCACAGCUUUCUUGAACUU	.:::.::::.::::::::.	CGGUUUAAGAGAGCUGUGGGC	Cleavage	cdna chromosome:IWGSC:1A:3256076:3262305:-1 gene:TraesCS1A01G005600 gene_biotype:protein_coding transcript_biotype:protein_coding	1
tae-miR396b	TraesCS1D01G002300.2	2.5	-1	1	21	247	267	UUCCACAGCUUUCUUGAACUU	.:::.::::.::::::::.	CGGUUUAAGAGAGCUGUGGGC	Cleavage	cdna chromosome:IWGSC:1D:548457:554361:-1 gene:TraesCS1D01G002300 gene_biotype:protein_coding transcript_biotype:protein_coding	1
tae-miR396b	TraesCS1B01G007800.4	2.5	-1	1	21	247	267	UUCCACAGCUUUCUUGAACUU	.:::.::::.::::::::.	CGGUUUAAGAGAGCUGUGGGC	Cleavage	cdna chromosome:IWGSC:1B:4320651:4326770:-1 gene:TraesCS1B01G007800 gene_biotype:protein_coding transcript_biotype:protein_coding	1
tae-miR396b	TraesCS1B01G007800.2	2.5	-1	1	21	247	267	UUCCACAGCUUUCUUGAACUU	.:::.::::.::::::::.	CGGUUUAAGAGAGCUGUGGGC	Cleavage	cdna chromosome:IWGSC:1B:4320651:4326770:-1 gene:TraesCS1B01G007800 gene_biotype:protein_coding transcript_biotype:protein_coding	1
tae-miR396b	TraesCS1A01G005600.3	2.5	-1	1	21	247	267	UUCCACAGCUUUCUUGAACUU	.:::.::::.::::::::.	CGGUUUAAGAGAGCUGUGGGC	Cleavage	cdna chromosome:IWGSC:1A:3256076:3262305:-1 gene:TraesCS1A01G005600 gene_biotype:protein_coding transcript_biotype:protein_coding	1
tae-miR396b	TraesCS1D01G002300.1	2.5	-1	1	21	359	379	UUCCACAGCUUUCUUGAACUU	.:::.::::.::::::::.	CGGUUUAAGAGAGCUGUGGGC	Cleavage	cdna chromosome:IWGSC:1D:548249:554473:-1 gene:TraesCS1D01G002300 gene_biotype:protein_coding transcript_biotype:protein_coding	1
tae-miR396b	TraesCS4A01G491500.1	2.5	-1	1	21	194	214	UUCCACAGCUUUCUUGAACUU	.::::::::.::.: :::::	UGGUUCAAGAGAGUUCUGGAA	Cleavage	cdna chromosome:IWGSC:4A:741129494:741130168:1 gene:TraesCS4A01G491500 gene_biotype:protein_coding transcript_biotype:protein_coding	1
tae-miR396b	TraesCS3A01G012300.2	2.5	-1	1	21	739	759	UUCCACAGCUUUCUUGAACUU	: :::.::::.::::::::.	CAAUUCGAGAAGGCUGUGGAG	Cleavage	cdna chromosome:IWGSC:3A:9546620:9550260:-1 gene:TraesCS3A01G012300 gene_biotype:protein_coding transcript_biotype:protein_coding	1
tae-miR396b	TraesCS3A01G012300.1	2.5	-1	1	21	751	771	UUCCACAGCUUUCUUGAACUU	: :::.::::.::::::::.	CAAUUCGAGAAGGCUGUGGAG	Cleavage	cdna chromosome:IWGSC:3A:9546620:9550260:-1 gene:TraesCS3A01G012300 gene_biotype:protein_coding transcript_biotype:protein_coding	1
tae-miR396b	TraesCS1A01G288400.2	2.5	-1	1	21	2293	2313	UUCCACAGCUUUCUUGAACUU	:::..::..:::::::::.	GUGUUUGAGGGAGCUGUGGAG	Cleavage	cdna chromosome:IWGSC:1A:485354311:485357210:1 gene:TraesCS1A01G288400 gene_biotype:protein_coding transcript_biotype:protein_coding	1
tae-miR396b	TraesCS1B01G297800.1	2.5	-1	1	21	3079	3099	UUCCACAGCUUUCUUGAACUU	:::..::..:::::::::.	GUGUUUGAGGGAGCUGUGGAG	Cleavage	cdna chromosome:IWGSC:1B:518176548:518180326:1 gene:TraesCS1B01G297800 gene_biotype:protein_coding transcript_biotype:protein_coding	1
tae-miR396b	TraesCS1D01G287400.1	2.5	-1	1	21	3100	3120	UUCCACAGCUUUCUUGAACUU	:::..::..:::::::::.	GUGUUUGAGGGAGCUGUGGAG	Cleavage	cdna chromosome:IWGSC:1D:385803197:385806997:1 gene:TraesCS1D01G287400 gene_biotype:protein_coding transcript_biotype:protein_coding	1
tae-miR396b	TraesCS1A01G288400.1	2.5	-1	1	21	3123	3143	UUCCACAGCUUUCUUGAACUU	:::..::..:::::::::.	GUGUUUGAGGGAGCUGUGGAG	Cleavage	cdna chromosome:IWGSC:1A:485353384:485357481:1 gene:TraesCS1A01G288400 gene_biotype:protein_coding transcript_biotype:protein_coding	1
tae-miR396b	TraesCS3B01G043900.1	3	-1	1	21	658	678	UUCCACAGCUUUCUUGAACUU	.::::::::::::. :::::	GAGUUCAAGAAAGUGGUGGAU	Cleavage	cdna chromosome:IWGSC:3B:22453141:22454274:-1 gene:TraesCS3B01G043900 gene_biotype:protein_coding transcript_biotype:protein_coding	1
tae-miR396b	TraesCS3D01G040200.2	3	-1	1	21	643	663	UUCCACAGCUUUCUUGAACUU	.::::::::::::. :::::	GAGUUCAAGAAAGUGGUGGAC	Cleavage	cdna chromosome:IWGSC:3D:15334997:15336254:-1 gene:TraesCS3D01G040200 gene_biotype:protein_coding transcript_biotype:protein_coding	1
tae-miR396b	TraesCS3A01G039600.1	3	-1	1	21	631	651	UUCCACAGCUUUCUUGAACUU	.::::::::::::. :::::	GAGUUCAAGAAAGUGGUGGAC	Cleavage	cdna chromosome:IWGSC:3A:20950910:20952577:1 gene:TraesCS3A01G039600 gene_biotype:protein_coding transcript_biotype:protein_coding	1
tae-miR396b	TraesCS3D01G376400.1	3	-1	1	21	664	684	UUCCACAGCUUUCUUGAACUU	.::::::::::::. :::::	GAGUUCAAGAAAGUGGUGGAC	Cleavage	cdna chromosome:IWGSC:3D:489744723:489746407:1 gene:TraesCS3D01G376400 gene_biotype:protein_coding transcript_biotype:protein_coding	1
tae-miR396b	TraesCS3D01G040200.1	3	-1	1	21	963	983	UUCCACAGCUUUCUUGAACUU	.::::::::::::. :::::	GAGUUCAAGAAAGUGGUGGAC	Cleavage	cdna chromosome:IWGSC:3D:15333882:15336574:-1 gene:TraesCS3D01G040200 gene_biotype:protein_coding transcript_biotype:protein_coding	1
tae-miR396b	TraesCS5B01G051500.1	3	-1	1	21	95	115	UUCCACAGCUUUCUUGAACUU	:.:::::::::.:. :::::.	AGGUUCAAGAAGGUAGUGGAG	Cleavage	cdna chromosome:IWGSC:5B:56334906:56335353:1 gene:TraesCS5B01G051500 gene_biotype:protein_coding transcript_biotype:protein_coding	1
tae-miR396b	TraesCS7A01G092100.1	3	-1	1	21	95	115	UUCCACAGCUUUCUUGAACUU	:.:::::::::.:. :::::.	AGGUUCAAGAAGGUAGUGGAG	Cleavage	cdna chromosome:IWGSC:7A:56072586:56073033:1 gene:TraesCS7A01G092100 gene_biotype:protein_coding transcript_biotype:protein_coding	1
tae-miR396b	TraesCS6D01G210700.2	3	-1	1	21	95	115	UUCCACAGCUUUCUUGAACUU	:.:::::::::.:. :::::.	AGGUUCAAGAAGGUAGUGGAG	Cleavage	cdna chromosome:IWGSC:6D:297172363:297172825:-1 gene:TraesCS6D01G210700 gene_biotype:protein_coding transcript_biotype:protein_coding	1
tae-miR396b	TraesCS3B01G091500.3	3	-1	1	21	95	115	UUCCACAGCUUUCUUGAACUU	:.:::::::::.:. :::::.	AGGUUCAAGAAGGUAGUGGAG	Cleavage	cdna chromosome:IWGSC:3B:60549898:60550361:-1 gene:TraesCS3B01G091500 gene_biotype:protein_coding transcript_biotype:protein_coding	1
tae-miR396b	TraesCS7B01G353400.2	3	-1	1	21	95	115	UUCCACAGCUUUCUUGAACUU	:.:::::::::.:. :::::.	AGGUUCAAGAAGGUAGUGGAG	Cleavage	cdna chromosome:IWGSC:7B:611049480:611049940:-1 gene:TraesCS7B01G353400 gene_biotype:protein_coding transcript_biotype:protein_coding	1
tae-miR396b	TraesCS2D01G587400.3	3	-1	1	21	95	115	UUCCACAGCUUUCUUGAACUU	:.:::::::::.:. :::::.	AGGUUCAAGAAGGUAGUGGAG	Cleavage	cdna chromosome:IWGSC:2D:645237530:645237995:-1 gene:TraesCS2D01G587400 gene_biotype:protein_coding transcript_biotype:protein_coding	1
tae-miR396b	TraesCS2D01G309600.1	3	-1	1	21	98	118	UUCCACAGCUUUCUUGAACUU	:.:::::::::.:. :::::.	AGGUUCAAGAAGGUAGUGGAG	Cleavage	cdna chromosome:IWGSC:2D:397129146:397129611:1 gene:TraesCS2D01G309600 gene_biotype:protein_coding transcript_biotype:protein_coding	1
tae-miR396b	TraesCS3D01G306400.1	3	-1	1	21	98	118	UUCCACAGCUUUCUUGAACUU	:.:::::::::.:. :::::.	AGGUUCAAGAAGGUAGUGGAG	Cleavage	cdna chromosome:IWGSC:3D:420357033:420357499:1 gene:TraesCS3D01G306400 gene_biotype:protein_coding transcript_biotype:protein_coding	1
tae-miR396b	TraesCS3A01G516000.1	3	-1	1	21	95	115	UUCCACAGCUUUCUUGAACUU	:.:::::::::.:. :::::.	AGGUUCAAGAAGGUAGUGGAG	Cleavage	cdna chromosome:IWGSC:3A:733879072:733881109:-1 gene:TraesCS3A01G516000 gene_biotype:protein_coding transcript_biotype:protein_coding	1
tae-miR396b	TraesCS3D01G339000.1	3	-1	1	21	943	963	UUCCACAGCUUUCUUGAACUU	.:::::::::..::::: :.:	GAGUUCAAGAGGGCUGUUGGA	Cleavage	cdna chromosome:IWGSC:3D:452176768:452179250:1 gene:TraesCS3D01G339000 gene_biotype:protein_coding transcript_biotype:protein_coding	1
tae-miR396b	TraesCS6A01G178200.1	3	-1	1	21	3667	3687	UUCCACAGCUUUCUUGAACUU	:.:::::::::::.:: ::..	AGGUUCAAGAAAGUUGAGGGG	Cleavage	cdna chromosome:IWGSC:6A:199994741:200005140:-1 gene:TraesCS6A01G178200 gene_biotype:protein_coding transcript_biotype:protein_coding	1
tae-miR396b	TraesCS6B01G206600.1	3	-1	1	21	3838	3858	UUCCACAGCUUUCUUGAACUU	:.:::::::::::.:: ::..	AGGUUCAAGAAAGUUGAGGGG	Cleavage	cdna chromosome:IWGSC:6B:260105649:260110969:1 gene:TraesCS6B01G206600 gene_biotype:protein_coding transcript_biotype:protein_coding	1
tae-miR396b	TraesCS6B01G267500.1	3	-1	1	21	507	528	UUCCACA-GCUUUCUUGAACUU	:::::::::::: :::::::	CCGUUCAAGAAAGCCUGUGGAA	Cleavage	cdna chromosome:IWGSC:6B:481089278:481090086:-1 gene:TraesCS6B01G267500 gene_biotype:protein_coding transcript_biotype:protein_coding	1
tae-miR396b	TraesCS6A01G257600.1	3	-1	1	21	498	519	UUCCACA-GCUUUCUUGAACUU	:::::::::::: :::::::	CCGUUCAAGAAAGCCUGUGGAA	Cleavage	cdna chromosome:IWGSC:6A:479833712:479834527:1 gene:TraesCS6A01G257600 gene_biotype:protein_coding transcript_biotype:protein_coding	1
tae-miR396b	TraesCS6D01G238900.1	3	-1	1	21	507	528	UUCCACA-GCUUUCUUGAACUU	:::::::::::: :::::::	CCGUUCAAGAAAGCCUGUGGAA	Cleavage	cdna chromosome:IWGSC:6D:339389420:339390265:1 gene:TraesCS6D01G238900 gene_biotype:protein_coding transcript_biotype:protein_coding	1
tae-miR396b	TraesCS7A01G165600.1	3	-1	1	21	381	402	UUCCACA-GCUUUCUUGAACUU	:::::::::::: :::::::	CCGUUCAAGAAAGCCUGUGGAA	Cleavage	cdna chromosome:IWGSC:7A:121056253:121057416:1 gene:TraesCS7A01G165600 gene_biotype:protein_coding transcript_biotype:protein_coding	1
tae-miR396b	TraesCS7A01G049100.2	3	-1	1	21	204	225	UUCCACA-GCUUUCUUGAACUU	:::::::::::: :::::::	CCGUUCAAGAAAGCCUGUGGAA	Cleavage	cdna chromosome:IWGSC:7A:22937802:22943978:-1 gene:TraesCS7A01G049100 gene_biotype:protein_coding transcript_biotype:protein_coding	1
tae-miR396b	TraesCS7B01G070200.1	3	-1	1	21	384	405	UUCCACA-GCUUUCUUGAACUU	:::::::::::: :::::::	CCGUUCAAGAAAGCCUGUGGAA	Cleavage	cdna chromosome:IWGSC:7B:76903925:76905096:1 gene:TraesCS7B01G070200 gene_biotype:protein_coding transcript_biotype:protein_coding	1
tae-miR396b	TraesCS7D01G166400.1	3	-1	1	21	384	405	UUCCACA-GCUUUCUUGAACUU	:::::::::::: :::::::	CCGUUCAAGAAAGCCUGUGGAA	Cleavage	cdna chromosome:IWGSC:7D:117132773:117133959:1 gene:TraesCS7D01G166400 gene_biotype:protein_coding transcript_biotype:protein_coding	1
tae-miR396b	TraesCS7D01G044200.1	3	-1	1	21	432	453	UUCCACA-GCUUUCUUGAACUU	:::::::::::: :::::::	CCGUUCAAGAAAGCCUGUGGAA	Cleavage	cdna chromosome:IWGSC:7D:22586526:22589173:-1 gene:TraesCS7D01G044200 gene_biotype:protein_coding transcript_biotype:protein_coding	1
tae-miR396b	TraesCS7A01G049100.1	3	-1	1	21	438	459	UUCCACA-GCUUUCUUGAACUU	:::::::::::: :::::::	CCGUUCAAGAAAGCCUGUGGAA	Cleavage	cdna chromosome:IWGSC:7A:22937762:22940558:-1 gene:TraesCS7A01G049100 gene_biotype:protein_coding transcript_biotype:protein_coding	1
tae-miR396b	TraesCS4A01G434900.1	3	-1	1	21	438	459	UUCCACA-GCUUUCUUGAACUU	:::::::::::: :::::::	CCGUUCAAGAAAGCCUGUGGAA	Cleavage	cdna chromosome:IWGSC:4A:705510262:705513006:-1 gene:TraesCS4A01G434900 gene_biotype:protein_coding transcript_biotype:protein_coding	1
tae-miR396b	TraesCS5A01G494100.1	3	-1	1	21	982	1002	UUCCACAGCUUUCUUGAACUU	.:: :::::.::::::: :::	GAGCUCAAGGAAGCUGUUGAA	Cleavage	cdna chromosome:IWGSC:5A:662727403:662731219:-1 gene:TraesCS5A01G494100 gene_biotype:protein_coding transcript_biotype:protein_coding	1
tae-miR396b	TraesCS4B01G318200.2	3	-1	1	21	982	1002	UUCCACAGCUUUCUUGAACUU	.:: :::::.::::::: :::	GAGCUCAAGGAAGCUGUUGAA	Cleavage	cdna chromosome:IWGSC:4B:608669348:608673342:1 gene:TraesCS4B01G318200 gene_biotype:protein_coding transcript_biotype:protein_coding	1
tae-miR396b	TraesCS5A01G494100.2	3	-1	1	21	982	1002	UUCCACAGCUUUCUUGAACUU	.:: :::::.::::::: :::	GAGCUCAAGGAAGCUGUUGAA	Cleavage	cdna chromosome:IWGSC:5A:662727403:662731219:-1 gene:TraesCS5A01G494100 gene_biotype:protein_coding transcript_biotype:protein_coding	1
tae-miR396b	TraesCS4B01G318200.3	3	-1	1	21	985	1005	UUCCACAGCUUUCUUGAACUU	.:: :::::.::::::: :::	GAGCUCAAGGAAGCUGUUGAA	Cleavage	cdna chromosome:IWGSC:4B:608669348:608673342:1 gene:TraesCS4B01G318200 gene_biotype:protein_coding transcript_biotype:protein_coding	1
tae-miR396b	TraesCS5A01G494100.3	3	-1	1	21	985	1005	UUCCACAGCUUUCUUGAACUU	.:: :::::.::::::: :::	GAGCUCAAGGAAGCUGUUGAA	Cleavage	cdna chromosome:IWGSC:5A:662727403:662731219:-1 gene:TraesCS5A01G494100 gene_biotype:protein_coding transcript_biotype:protein_coding	1
tae-miR396b	TraesCS2B01G458400.1	3	-1	1	21	462	483	UUCCACA-GCUUUCUUGAACUU	:::::::::::: :::::::	CCGUUCAAGAAAGCCUGUGGAA	Cleavage	cdna chromosome:IWGSC:2B:653016514:653019764:1 gene:TraesCS2B01G458400 gene_biotype:protein_coding transcript_biotype:protein_coding	1
tae-miR396b	TraesCS6B01G296900.1	3	-1	1	21	462	483	UUCCACA-GCUUUCUUGAACUU	:::::::::::: :::::::	CCGUUCAAGAAAGCCUGUGGAA	Cleavage	cdna chromosome:IWGSC:6B:532900263:532903528:-1 gene:TraesCS6B01G296900 gene_biotype:protein_coding transcript_biotype:protein_coding	1
tae-miR396b	TraesCS6A01G269600.1	3	-1	1	21	471	492	UUCCACA-GCUUUCUUGAACUU	:::::::::::: :::::::	CCGUUCAAGAAAGCCUGUGGAA	Cleavage	cdna chromosome:IWGSC:6A:496010717:496017053:-1 gene:TraesCS6A01G269600 gene_biotype:protein_coding transcript_biotype:protein_coding	1
tae-miR396b	TraesCS6D01G245300.1	3	-1	1	21	468	489	UUCCACA-GCUUUCUUGAACUU	:::::::::::: :::::::	CCGUUCAAGAAAGCCUGUGGAA	Cleavage	cdna chromosome:IWGSC:6D:347433395:347436672:1 gene:TraesCS6D01G245300 gene_biotype:protein_coding transcript_biotype:protein_coding	1
tae-miR396b	TraesCS6B01G366700.1	3	-1	1	21	387	408	UUCCACA-GCUUUCUUGAACUU	:::::::::::: :::::::	CCGUUCAAGAAAGCCUGUGGAA	Cleavage	cdna chromosome:IWGSC:6B:639533339:639534769:-1 gene:TraesCS6B01G366700 gene_biotype:protein_coding transcript_biotype:protein_coding	1
tae-miR396b	TraesCS6D01G315700.1	3	-1	1	21	387	408	UUCCACA-GCUUUCUUGAACUU	:::::::::::: :::::::	CCGUUCAAGAAAGCCUGUGGAA	Cleavage	cdna chromosome:IWGSC:6D:423815291:423816726:-1 gene:TraesCS6D01G315700 gene_biotype:protein_coding transcript_biotype:protein_coding	1
tae-miR396b	TraesCS4D01G020300.1	3	-1	1	21	537	558	UUCCACA-GCUUUCUUGAACUU	:::::::::::: :::::::	UCGUUCAAGAAAGCCUGUGGAA	Cleavage	cdna chromosome:IWGSC:4D:8777205:8779670:1 gene:TraesCS4D01G020300 gene_biotype:protein_coding transcript_biotype:protein_coding	1
tae-miR396b	TraesCS6B01G127400.1	3	-1	1	21	976	996	UUCCACAGCUUUCUUGAACUU	:. ::::::.::::::: :::	AGAUUCAAGGAAGCUGUAGAA	Cleavage	cdna chromosome:IWGSC:6B:123017481:123018782:-1 gene:TraesCS6B01G127400 gene_biotype:protein_coding transcript_biotype:protein_coding	1
tae-miR396b	TraesCS4A01G291500.1	3	-1	1	21	596	617	UUCCACA-GCUUUCUUGAACUU	:::::::::::: :::::::	UCGUUCAAGAAAGCCUGUGGAA	Cleavage	cdna chromosome:IWGSC:4A:594533060:594535487:-1 gene:TraesCS4A01G291500 gene_biotype:protein_coding transcript_biotype:protein_coding	1
tae-miR396b	TraesCS2A01G435100.1	3	-1	1	21	722	743	UUCCACA-GCUUUCUUGAACUU	:::::::::::: :::::::	CCGUUCAAGAAAGCCUGUGGAA	Cleavage	cdna chromosome:IWGSC:2A:687048699:687052358:1 gene:TraesCS2A01G435100 gene_biotype:protein_coding transcript_biotype:protein_coding	1
tae-miR396b	TraesCS4B01G318200.1	3	-1	1	21	1108	1128	UUCCACAGCUUUCUUGAACUU	.:: :::::.::::::: :::	GAGCUCAAGGAAGCUGUUGAA	Cleavage	cdna chromosome:IWGSC:4B:608669222:608673751:1 gene:TraesCS4B01G318200 gene_biotype:protein_coding transcript_biotype:protein_coding	1
tae-miR396b	TraesCS2D01G435200.1	3	-1	1	21	659	680	UUCCACA-GCUUUCUUGAACUU	:::::::::::: :::::::	CCGUUCAAGAAAGCCUGUGGAA	Cleavage	cdna chromosome:IWGSC:2D:546208321:546212228:1 gene:TraesCS2D01G435200 gene_biotype:protein_coding transcript_biotype:protein_coding	1
tae-miR396b	TraesCS6A01G335900.1	3	-1	1	21	545	566	UUCCACA-GCUUUCUUGAACUU	:::::::::::: :::::::	CCGUUCAAGAAAGCCUGUGGAA	Cleavage	cdna chromosome:IWGSC:6A:568515939:568517944:-1 gene:TraesCS6A01G335900 gene_biotype:protein_coding transcript_biotype:protein_coding	1
tae-miR396b	TraesCS4A01G255000.1	3	-1	1	21	741	762	UUCCACA-GCUUUCUUGAACUU	:::::::::::: :::::::	UCGUUCAAGAAAGCAUGUGGAA	Cleavage	cdna chromosome:IWGSC:4A:567181746:567185221:-1 gene:TraesCS4A01G255000 gene_biotype:protein_coding transcript_biotype:protein_coding	1
tae-miR396b	TraesCS4D01G059600.1	3	-1	1	21	783	804	UUCCACA-GCUUUCUUGAACUU	:::::::::::: :::::::	UCGUUCAAGAAAGCAUGUGGAA	Cleavage	cdna chromosome:IWGSC:4D:35477057:35480997:1 gene:TraesCS4D01G059600 gene_biotype:protein_coding transcript_biotype:protein_coding	1
tae-miR396b	TraesCS4B01G060000.1	3	-1	1	21	853	874	UUCCACA-GCUUUCUUGAACUU	:::::::::::: :::::::	UCGUUCAAGAAAGCAUGUGGAA	Cleavage	cdna chromosome:IWGSC:4B:51679823:51683700:1 gene:TraesCS4B01G060000 gene_biotype:protein_coding transcript_biotype:protein_coding	1
tae-miR396b	TraesCS5D01G505700.2	3	-1	1	21	784	804	UUCCACAGCUUUCUUGAACUU	..:::..::.::: :::::::	GGGUUUGAGGAAGAUGUGGAA	Cleavage	cdna chromosome:IWGSC:5D:531510846:531516963:-1 gene:TraesCS5D01G505700 gene_biotype:protein_coding transcript_biotype:protein_coding	1
tae-miR396b	TraesCS5D01G505700.1	3	-1	1	21	784	804	UUCCACAGCUUUCUUGAACUU	..:::..::.::: :::::::	GGGUUUGAGGAAGAUGUGGAA	Cleavage	cdna chromosome:IWGSC:5D:531510345:531516963:-1 gene:TraesCS5D01G505700 gene_biotype:protein_coding transcript_biotype:protein_coding	1
tae-miR396b	TraesCS3B01G611500.1	3	-1	1	21	1474	1494	UUCCACAGCUUUCUUGAACUU	.:::.:::::.: ::::::.	UGGUUUAAGAAGGGUGUGGAG	Cleavage	cdna chromosome:IWGSC:3B:829252291:829254120:1 gene:TraesCS3B01G611500 gene_biotype:protein_coding transcript_biotype:protein_coding	1
tae-miR396b	TraesCS5B01G557000.1	3	-1	1	21	90	110	UUCCACAGCUUUCUUGAACUU	::: ::: :.::::::::::	CAGUGCAAAAGAGCUGUGGAA	Cleavage	cdna chromosome:IWGSC:5B:705081122:705085224:-1 gene:TraesCS5B01G557000 gene_biotype:protein_coding transcript_biotype:protein_coding	1
tae-miR396b	TraesCS3A01G361300.1	3	-1	1	21	820	840	UUCCACAGCUUUCUUGAACUU	.:: ::::::.::::::::.	GAGGCCAAGAAGGCUGUGGAG	Cleavage	cdna chromosome:IWGSC:3A:609473543:609476815:1 gene:TraesCS3A01G361300 gene_biotype:protein_coding transcript_biotype:protein_coding	1
tae-miR396b	TraesCS7B01G453200.1	3	-1	1	21	1069	1089	UUCCACAGCUUUCUUGAACUU	::::::::.:::: ::::	CGUUUCAAGAAGGCUGAGGAA	Cleavage	cdna chromosome:IWGSC:7B:714460294:714461544:-1 gene:TraesCS7B01G453200 gene_biotype:protein_coding transcript_biotype:protein_coding	1
tae-miR396b	TraesCS7B01G245900.1	3	-1	1	21	361	381	UUCCACAGCUUUCUUGAACUU	::::.:::::::::: ::	CUUUUCAGGAAAGCUGUGCAA	Cleavage	cdna chromosome:IWGSC:7B:454520352:454524813:1 gene:TraesCS7B01G245900 gene_biotype:protein_coding transcript_biotype:protein_coding	1
tae-miR396b	TraesCS3D01G355000.1	3	-1	1	21	817	837	UUCCACAGCUUUCUUGAACUU	.:: ::::::.::::::::.	GAGGCCAAGAAGGCUGUGGAG	Cleavage	cdna chromosome:IWGSC:3D:466280663:466284388:1 gene:TraesCS3D01G355000 gene_biotype:protein_coding transcript_biotype:protein_coding	1
tae-miR396b	TraesCS7B01G245900.2	3	-1	1	21	361	381	UUCCACAGCUUUCUUGAACUU	::::.:::::::::: ::	CUUUUCAGGAAAGCUGUGCAA	Cleavage	cdna chromosome:IWGSC:7B:454520352:454524813:1 gene:TraesCS7B01G245900 gene_biotype:protein_coding transcript_biotype:protein_coding	1
tae-miR396b	TraesCSU01G017900.1	3	-1	1	21	592	612	UUCCACAGCUUUCUUGAACUU	:::::::::.::: ::::	GCGUUCAAGAAGGCUCUGGAC	Cleavage	cdna chromosome:IWGSC:Un:19783281:19784960:-1 gene:TraesCSU01G017900 gene_biotype:protein_coding transcript_biotype:protein_coding	1
tae-miR396b	TraesCS3D01G081200.1	3	-1	1	21	688	708	UUCCACAGCUUUCUUGAACUU	:::::::::.::: ::::	GCGUUCAAGAAGGCUCUGGAC	Cleavage	cdna chromosome:IWGSC:3D:40773894:40775676:1 gene:TraesCS3D01G081200 gene_biotype:protein_coding transcript_biotype:protein_coding	1
tae-miR396b	TraesCS6A01G088500.1	3	-1	1	21	765	785	UUCCACAGCUUUCUUGAACUU	:::::::::.::: ::::	GCGUUCAAGAAGGCUCUGGAC	Cleavage	cdna chromosome:IWGSC:6A:57423712:57425553:1 gene:TraesCS6A01G088500 gene_biotype:protein_coding transcript_biotype:protein_coding	1
tae-miR396b	TraesCS5D01G268000.2	3	-1	1	21	1408	1428	UUCCACAGCUUUCUUGAACUU	.:: ::::::.::::::::.	GAGAGCAAGAAGGCUGUGGAG	Cleavage	cdna chromosome:IWGSC:5D:371469391:371472606:-1 gene:TraesCS5D01G268000 gene_biotype:protein_coding transcript_biotype:protein_coding	1
tae-miR396b	TraesCS5A01G260600.1	3	-1	1	21	1204	1224	UUCCACAGCUUUCUUGAACUU	.:: ::::::.::::::::.	GAGAGCAAGAAGGCUGUGGAG	Cleavage	cdna chromosome:IWGSC:5A:474541564:474544822:-1 gene:TraesCS5A01G260600 gene_biotype:protein_coding transcript_biotype:protein_coding	1
tae-miR396b	TraesCS5A01G260600.2	3	-1	1	21	1222	1242	UUCCACAGCUUUCUUGAACUU	.:: ::::::.::::::::.	GAGAGCAAGAAGGCUGUGGAG	Cleavage	cdna chromosome:IWGSC:5A:474541564:474544822:-1 gene:TraesCS5A01G260600 gene_biotype:protein_coding transcript_biotype:protein_coding	1
tae-miR396b	TraesCS7B01G149200.2	3	-1	1	21	1408	1428	UUCCACAGCUUUCUUGAACUU	.:: ::::::.::::::::.	GAGAGCAAGAAGGCUGUGGAG	Cleavage	cdna chromosome:IWGSC:7B:196904990:196908717:1 gene:TraesCS7B01G149200 gene_biotype:protein_coding transcript_biotype:protein_coding	1
tae-miR396b	TraesCS1B01G279600.1	3	-1	1	21	349	369	UUCCACAGCUUUCUUGAACUU	..: :...::::::::::::.	GGGCUUGGGAAAGCUGUGGAG	Cleavage	cdna chromosome:IWGSC:1B:488208308:488215309:1 gene:TraesCS1B01G279600 gene_biotype:protein_coding transcript_biotype:protein_coding	1
tae-miR396b	TraesCS5B01G258900.3	3	-1	1	21	1252	1272	UUCCACAGCUUUCUUGAACUU	.:: ::::::.::::::::.	GAGAGCAAGAAGGCUGUGGAG	Cleavage	cdna chromosome:IWGSC:5B:441449528:441452792:-1 gene:TraesCS5B01G258900 gene_biotype:protein_coding transcript_biotype:protein_coding	1
tae-miR396b	TraesCS5B01G258900.2	3	-1	1	21	1408	1428	UUCCACAGCUUUCUUGAACUU	.:: ::::::.::::::::.	GAGAGCAAGAAGGCUGUGGAG	Cleavage	cdna chromosome:IWGSC:5B:441449528:441452792:-1 gene:TraesCS5B01G258900 gene_biotype:protein_coding transcript_biotype:protein_coding	1
tae-miR396b	TraesCS5A01G260600.3	3	-1	1	21	1408	1428	UUCCACAGCUUUCUUGAACUU	.:: ::::::.::::::::.	GAGAGCAAGAAGGCUGUGGAG	Cleavage	cdna chromosome:IWGSC:5A:474541564:474544822:-1 gene:TraesCS5A01G260600 gene_biotype:protein_coding transcript_biotype:protein_coding	1
tae-miR396b	TraesCS5D01G268000.1	3	-1	1	21	1444	1464	UUCCACAGCUUUCUUGAACUU	.:: ::::::.::::::::.	GAGAGCAAGAAGGCUGUGGAG	Cleavage	cdna chromosome:IWGSC:5D:371469178:371472642:-1 gene:TraesCS5D01G268000 gene_biotype:protein_coding transcript_biotype:protein_coding	1
tae-miR396b	TraesCS7B01G149200.1	3	-1	1	21	1516	1536	UUCCACAGCUUUCUUGAACUU	.:: ::::::.::::::::.	GAGAGCAAGAAGGCUGUGGAG	Cleavage	cdna chromosome:IWGSC:7B:196904882:196908870:1 gene:TraesCS7B01G149200 gene_biotype:protein_coding transcript_biotype:protein_coding	1
tae-miR396b	TraesCS7A01G242200.1	3	-1	1	21	1523	1543	UUCCACAGCUUUCUUGAACUU	.:: ::::::.::::::::.	GAGAGCAAGAAGGCUGUGGAG	Cleavage	cdna chromosome:IWGSC:7A:217555694:217559742:-1 gene:TraesCS7A01G242200 gene_biotype:protein_coding transcript_biotype:protein_coding	1
tae-miR396b	TraesCS1D01G347500.1	3.5	-1	1	21	292	312	UUCCACAGCUUUCUUGAACUU	.:::::.::: .::::::::	GAGUUCGAGAUGGCUGUGGAU	Translation	cdna chromosome:IWGSC:1D:434385916:434388289:1 gene:TraesCS1D01G347500 gene_biotype:protein_coding transcript_biotype:protein_coding	1
tae-miR396b	TraesCS1D01G011600.1	3.5	-1	1	21	310	330	UUCCACAGCUUUCUUGAACUU	.:::::.::::.::: ::::	GAGUUCGAGAAGGCUUUGGAU	Cleavage	cdna chromosome:IWGSC:1D:6325851:6328322:-1 gene:TraesCS1D01G011600 gene_biotype:protein_coding transcript_biotype:protein_coding	1
tae-miR396b	TraesCS1A01G013700.1	3.5	-1	1	21	310	330	UUCCACAGCUUUCUUGAACUU	.:::::.::::.::: ::::	GAGUUCGAGAAGGCUUUGGAU	Cleavage	cdna chromosome:IWGSC:1A:7651806:7654067:-1 gene:TraesCS1A01G013700 gene_biotype:protein_coding transcript_biotype:protein_coding	1
tae-miR396b	TraesCS5D01G407500.1	3.5	-1	1	21	724	744	UUCCACAGCUUUCUUGAACUU	.::::::::::.:. :::::	GAGUUCAAGAAGGUGGUGGAC	Cleavage	cdna chromosome:IWGSC:5D:472626769:472628484:1 gene:TraesCS5D01G407500 gene_biotype:protein_coding transcript_biotype:protein_coding	1
tae-miR396b	TraesCS5B01G403100.1	3.5	-1	1	21	721	741	UUCCACAGCUUUCUUGAACUU	.::::::::::.:. :::::	GAGUUCAAGAAGGUGGUGGAC	Cleavage	cdna chromosome:IWGSC:5B:580073175:580075133:1 gene:TraesCS5B01G403100 gene_biotype:protein_coding transcript_biotype:protein_coding	1
tae-miR396b	TraesCS5A01G397900.1	3.5	-1	1	21	675	695	UUCCACAGCUUUCUUGAACUU	.::::::::::.:. :::::	GAGUUCAAGAAGGUGGUGGAC	Cleavage	cdna chromosome:IWGSC:5A:592122391:592125150:1 gene:TraesCS5A01G397900 gene_biotype:protein_coding transcript_biotype:protein_coding	1
tae-miR396b	TraesCS5A01G398000.1	3.5	-1	1	21	695	715	UUCCACAGCUUUCUUGAACUU	.::::::::::.:. :::::	GAGUUCAAGAAGGUGGUGGAC	Cleavage	cdna chromosome:IWGSC:5A:592198184:592199947:1 gene:TraesCS5A01G398000 gene_biotype:protein_coding transcript_biotype:protein_coding	1
tae-miR396b	TraesCS5B01G402900.1	3.5	-1	1	21	732	752	UUCCACAGCUUUCUUGAACUU	.::::::::::.:. :::::	GAGUUCAAGAAGGUGGUGGAC	Cleavage	cdna chromosome:IWGSC:5B:579590858:579594492:1 gene:TraesCS5B01G402900 gene_biotype:protein_coding transcript_biotype:protein_coding	1
tae-miR396b	TraesCS5B01G403000.1	3.5	-1	1	21	723	743	UUCCACAGCUUUCUUGAACUU	.::::::::::.:. :::::	GAGUUCAAGAAGGUGGUGGAC	Cleavage	cdna chromosome:IWGSC:5B:579807353:579810453:1 gene:TraesCS5B01G403000 gene_biotype:protein_coding transcript_biotype:protein_coding	1
tae-miR396b	TraesCS5A01G319100.2	3.5	-1	1	21	80	100	UUCCACAGCUUUCUUGAACUU	:.::::::::..:. :::::.	AGGUUCAAGAGGGUAGUGGAG	Cleavage	cdna chromosome:IWGSC:5A:530199061:530199510:-1 gene:TraesCS5A01G319100 gene_biotype:protein_coding transcript_biotype:protein_coding	1
tae-miR396b	TraesCS6B01G132500.1	3.5	-1	1	21	667	687	UUCCACAGCUUUCUUGAACUU	.::::::::: :::: ::::.	GAGUUCAAGACAGCUCUGGAG	Translation	cdna chromosome:IWGSC:6B:129302186:129304670:-1 gene:TraesCS6B01G132500 gene_biotype:protein_coding transcript_biotype:protein_coding	1
tae-miR396b	TraesCS6D01G091900.2	3.5	-1	1	21	769	789	UUCCACAGCUUUCUUGAACUU	.::::::::: :::: ::::.	GAGUUCAAGACAGCUCUGGAG	Translation	cdna chromosome:IWGSC:6D:57470499:57472857:-1 gene:TraesCS6D01G091900 gene_biotype:protein_coding transcript_biotype:protein_coding	1
tae-miR396b	TraesCS6D01G091900.1	3.5	-1	1	21	721	741	UUCCACAGCUUUCUUGAACUU	.::::::::: :::: ::::.	GAGUUCAAGACAGCUCUGGAG	Translation	cdna chromosome:IWGSC:6D:57470259:57472911:-1 gene:TraesCS6D01G091900 gene_biotype:protein_coding transcript_biotype:protein_coding	1
tae-miR396b	TraesCS6B01G394700.1	3.5	-1	1	21	694	714	UUCCACAGCUUUCUUGAACUU	:.::::::: . :::::::::	AGGUUCAAGUGUGCUGUGGAA	Translation	cdna chromosome:IWGSC:6B:669998970:670002222:1 gene:TraesCS6B01G394700 gene_biotype:protein_coding transcript_biotype:protein_coding	1
tae-miR396b	TraesCS1B01G473200.1	3.5	-1	1	21	1120	1140	UUCCACAGCUUUCUUGAACUU	.::::::::.: : :::::::	GAGUUCAAGGAUGGUGUGGAA	Translation	cdna chromosome:IWGSC:1B:681452802:681463995:-1 gene:TraesCS1B01G473200 gene_biotype:protein_coding transcript_biotype:protein_coding	1
tae-miR396b	TraesCS5A01G300100.1	3.5	-1	1	21	682	702	UUCCACAGCUUUCUUGAACUU	::: :::::.::::::: ::.	AAGGUCAAGGAAGCUGUCGAG	Cleavage	cdna chromosome:IWGSC:5A:509217290:509218987:1 gene:TraesCS5A01G300100 gene_biotype:protein_coding transcript_biotype:protein_coding	1
tae-miR396b	TraesCS5B01G301300.1	3.5	-1	1	21	729	749	UUCCACAGCUUUCUUGAACUU	::: :::::.::::::: ::.	AAGGUCAAGGAAGCUGUCGAG	Cleavage	cdna chromosome:IWGSC:5B:486040255:486042099:-1 gene:TraesCS5B01G301300 gene_biotype:protein_coding transcript_biotype:protein_coding	1
tae-miR396b	TraesCS6D01G336400.1	3.5	-1	1	21	2095	2115	UUCCACAGCUUUCUUGAACUU	::: ::.::.::::::: :::	AAGGUCGAGGAAGCUGUUGAA	Cleavage	cdna chromosome:IWGSC:6D:437281529:437289603:1 gene:TraesCS6D01G336400 gene_biotype:protein_coding transcript_biotype:protein_coding	1
tae-miR396b	TraesCS6A01G354100.1	3.5	-1	1	21	2095	2115	UUCCACAGCUUUCUUGAACUU	::: ::.::.::::::: :::	AAGGUCGAGGAAGCUGUUGAA	Cleavage	cdna chromosome:IWGSC:6A:585485706:585494057:1 gene:TraesCS6A01G354100 gene_biotype:protein_coding transcript_biotype:protein_coding	1
tae-miR396b	TraesCS6D01G336400.2	3.5	-1	1	21	2104	2124	UUCCACAGCUUUCUUGAACUU	::: ::.::.::::::: :::	AAGGUCGAGGAAGCUGUUGAA	Cleavage	cdna chromosome:IWGSC:6D:437281529:437289603:1 gene:TraesCS6D01G336400 gene_biotype:protein_coding transcript_biotype:protein_coding	1
tae-miR396b	TraesCS6D01G336400.3	3.5	-1	1	21	2122	2142	UUCCACAGCUUUCUUGAACUU	::: ::.::.::::::: :::	AAGGUCGAGGAAGCUGUUGAA	Cleavage	cdna chromosome:IWGSC:6D:437281529:437289603:1 gene:TraesCS6D01G336400 gene_biotype:protein_coding transcript_biotype:protein_coding	1
tae-miR396b	TraesCS6A01G354100.2	3.5	-1	1	21	2122	2142	UUCCACAGCUUUCUUGAACUU	::: ::.::.::::::: :::	AAGGUCGAGGAAGCUGUUGAA	Cleavage	cdna chromosome:IWGSC:6A:585485706:585494057:1 gene:TraesCS6A01G354100 gene_biotype:protein_coding transcript_biotype:protein_coding	1
tae-miR396b	TraesCS5D01G407400.1	3.5	-1	1	21	747	767	UUCCACAGCUUUCUUGAACUU	::::::::::.:. :::::	CAGUUCAAGAAGGUGGUGGAC	Cleavage	cdna chromosome:IWGSC:5D:472568440:472571240:1 gene:TraesCS5D01G407400 gene_biotype:protein_coding transcript_biotype:protein_coding	1
tae-miR396b	TraesCS2A01G194400.1	3.5	-1	1	21	70	90	UUCCACAGCUUUCUUGAACUU	.:: :..::::.::::::::	GAGAUUGAGAAGGCUGUGGAC	Cleavage	cdna chromosome:IWGSC:2A:162413786:162418550:1 gene:TraesCS2A01G194400 gene_biotype:protein_coding transcript_biotype:protein_coding	1
tae-miR396b	TraesCS1D01G094500.1	3.5	-1	1	21	331	351	UUCCACAGCUUUCUUGAACUU	.:: :..::::.:.::::::.	GAGCUUGAGAAGGUUGUGGAG	Cleavage	cdna chromosome:IWGSC:1D:80293945:80294343:-1 gene:TraesCS1D01G094500 gene_biotype:protein_coding transcript_biotype:protein_coding	1
tae-miR396b	TraesCS2D01G359300.1	3.5	-1	1	21	331	351	UUCCACAGCUUUCUUGAACUU	.:: :..::::.:.::::::.	GAGCUUGAGAAGGUUGUGGAG	Cleavage	cdna chromosome:IWGSC:2D:461089276:461089674:1 gene:TraesCS2D01G359300 gene_biotype:protein_coding transcript_biotype:protein_coding	1
tae-miR396b	TraesCS1D01G142200.1	3.5	-1	1	21	3989	4009	UUCCACAGCUUUCUUGAACUU	.::: :::::::::: ::::	GAGUACAAGAAAGCUUUGGAC	Cleavage	cdna chromosome:IWGSC:1D:196793535:196825468:-1 gene:TraesCS1D01G142200 gene_biotype:protein_coding transcript_biotype:protein_coding	1
tae-miR396b	TraesCS1B01G160800.1	3.5	-1	1	21	3989	4009	UUCCACAGCUUUCUUGAACUU	.::: :::::::::: ::::	GAGUACAAGAAAGCUUUGGAC	Cleavage	cdna chromosome:IWGSC:1B:277420296:277458215:-1 gene:TraesCS1B01G160800 gene_biotype:protein_coding transcript_biotype:protein_coding	1
tae-miR396b	TraesCS1A01G143400.1	3.5	-1	1	21	3995	4015	UUCCACAGCUUUCUUGAACUU	.::: :::::::::: ::::	GAGUACAAGAAAGCUUUGGAC	Cleavage	cdna chromosome:IWGSC:1A:247312234:247347158:-1 gene:TraesCS1A01G143400 gene_biotype:protein_coding transcript_biotype:protein_coding	1
tae-miR396b	TraesCS6D01G356900.1	3.5	-1	1	21	619	639	UUCCACAGCUUUCUUGAACUU	.:: :..::::.:.::::::.	GAGCUUGAGAAGGUUGUGGAG	Cleavage	cdna chromosome:IWGSC:6D:450843440:450844710:1 gene:TraesCS6D01G356900 gene_biotype:protein_coding transcript_biotype:protein_coding	1
tae-miR396b	TraesCS1A01G162000.1	3.5	-1	1	21	622	642	UUCCACAGCUUUCUUGAACUU	.:: :..::::.:.::::::.	GAGCUUGAGAAGGUUGUGGAG	Cleavage	cdna chromosome:IWGSC:1A:290557294:290558542:1 gene:TraesCS1A01G162000 gene_biotype:protein_coding transcript_biotype:protein_coding	1
tae-miR396b	TraesCS2B01G066500.1	3.5	-1	1	21	439	459	UUCCACAGCUUUCUUGAACUU	.:: :...:.:::.:::::::	GAGAUUGGGGAAGUUGUGGAA	Cleavage	cdna chromosome:IWGSC:2B:33548367:33549320:1 gene:TraesCS2B01G066500 gene_biotype:protein_coding transcript_biotype:protein_coding	1
tae-miR396b	TraesCSU01G034300.1	3.5	-1	1	21	700	720	UUCCACAGCUUUCUUGAACUU	.:: :..::::.:.::::::.	GAGCUUGAGAAGGUUGUGGAG	Cleavage	cdna chromosome:IWGSC:Un:30039425:30040973:-1 gene:TraesCSU01G034300 gene_biotype:protein_coding transcript_biotype:protein_coding	1
tae-miR396b	TraesCS6B01G372000.1	3.5	-1	1	21	689	709	UUCCACAGCUUUCUUGAACUU	.:: :..::::.:.::::::.	GAGCUUGAGAAGGUUGUGGAG	Cleavage	cdna chromosome:IWGSC:6B:645539313:645541007:1 gene:TraesCS6B01G372000 gene_biotype:protein_coding transcript_biotype:protein_coding	1
tae-miR396b	TraesCS4D01G314500.2	3.5	-1	1	21	1003	1023	UUCCACAGCUUUCUUGAACUU	.:: :.:::.::::::: :::	GAGCUUAAGGAAGCUGUUGAA	Cleavage	cdna chromosome:IWGSC:4D:480824612:480828469:1 gene:TraesCS4D01G314500 gene_biotype:protein_coding transcript_biotype:protein_coding	1
tae-miR396b	TraesCS2A01G092300.1	3.5	-1	1	21	1179	1199	UUCCACAGCUUUCUUGAACUU	.:: :..::::.:.::::::.	GAGAUUGAGAAGGUUGUGGAG	Cleavage	cdna chromosome:IWGSC:2A:45102964:45104841:1 gene:TraesCS2A01G092300 gene_biotype:protein_coding transcript_biotype:protein_coding	1
tae-miR396b	TraesCS4A01G381400.1	3.5	-1	1	21	1213	1233	UUCCACAGCUUUCUUGAACUU	::: :.::::.::::::::.	AAGGCCGAGAAGGCUGUGGAG	Cleavage	cdna chromosome:IWGSC:4A:658950350:658955375:-1 gene:TraesCS4A01G381400 gene_biotype:protein_coding transcript_biotype:protein_coding	1
tae-miR396b	TraesCS4D01G314500.1	3.5	-1	1	21	1021	1041	UUCCACAGCUUUCUUGAACUU	.:: :.:::.::::::: :::	GAGCUUAAGGAAGCUGUUGAA	Cleavage	cdna chromosome:IWGSC:4D:480824573:480828687:1 gene:TraesCS4D01G314500 gene_biotype:protein_coding transcript_biotype:protein_coding	1
tae-miR396b	TraesCS2A01G397000.1	3.5	-1	1	21	1324	1344	UUCCACAGCUUUCUUGAACUU	:. ::::.::::: ::::::.	AGUUUCAGGAAAGGUGUGGAG	Cleavage	cdna chromosome:IWGSC:2A:650629659:650632928:-1 gene:TraesCS2A01G397000 gene_biotype:protein_coding transcript_biotype:protein_coding	1
tae-miR396b	TraesCS2B01G415300.1	3.5	-1	1	21	1327	1347	UUCCACAGCUUUCUUGAACUU	:. ::::.::::: ::::::.	AGUUUCAGGAAAGGUGUGGAG	Cleavage	cdna chromosome:IWGSC:2B:593658289:593661547:-1 gene:TraesCS2B01G415300 gene_biotype:protein_coding transcript_biotype:protein_coding	1
tae-miR396b	TraesCS2D01G394800.1	3.5	-1	1	21	1333	1353	UUCCACAGCUUUCUUGAACUU	:. ::::.::::: ::::::.	AGUUUCAGGAAAGGUGUGGAG	Cleavage	cdna chromosome:IWGSC:2D:506147597:506150859:-1 gene:TraesCS2D01G394800 gene_biotype:protein_coding transcript_biotype:protein_coding	1
tae-miR396b	TraesCS4D01G217900.1	3.5	-1	1	21	1579	1599	UUCCACAGCUUUCUUGAACUU	:.::::: :::.:: :::::.	AGGUUCAUGAAGGCCGUGGAG	Cleavage	cdna chromosome:IWGSC:4D:373636654:373638746:1 gene:TraesCS4D01G217900 gene_biotype:protein_coding transcript_biotype:protein_coding	2
tae-miR396b	TraesCS4D01G217900.1	3.5	-1	1	21	1930	1950	UUCCACAGCUUUCUUGAACUU	::: ::::.:.:.:::::..	CAGUCCAAGGAGGUUGUGGGG	Cleavage	cdna chromosome:IWGSC:4D:373636654:373638746:1 gene:TraesCS4D01G217900 gene_biotype:protein_coding transcript_biotype:protein_coding	2
tae-miR396b	TraesCS1B01G139500.2	3.5	-1	1	21	1540	1560	UUCCACAGCUUUCUUGAACUU	.:::: .:::::::::: ::.	GAGUUGGAGAAAGCUGUCGAG	Cleavage	cdna chromosome:IWGSC:1B:183479642:183484226:1 gene:TraesCS1B01G139500 gene_biotype:protein_coding transcript_biotype:protein_coding	1
tae-miR396b	TraesCS1A01G120100.3	3.5	-1	1	21	1543	1563	UUCCACAGCUUUCUUGAACUU	.:::: .:::::::::: ::.	GAGUUGGAGAAAGCUGUUGAG	Cleavage	cdna chromosome:IWGSC:1A:132481070:132485645:1 gene:TraesCS1A01G120100 gene_biotype:protein_coding transcript_biotype:protein_coding	1
tae-miR396b	TraesCS6B01G295400.2	3.5	-1	1	21	811	831	UUCCACAGCUUUCUUGAACUU	::: : .::.:::.:::::::	AAGCUGGAGGAAGUUGUGGAA	Cleavage	cdna chromosome:IWGSC:6B:530566191:530569701:1 gene:TraesCS6B01G295400 gene_biotype:protein_coding transcript_biotype:protein_coding	2
tae-miR396b	TraesCS6D01G246700.2	3.5	-1	1	21	805	825	UUCCACAGCUUUCUUGAACUU	::: : .::.:::.:::::::	AAGCUGGAGGAAGUUGUGGAA	Cleavage	cdna chromosome:IWGSC:6D:349918338:349921863:-1 gene:TraesCS6D01G246700 gene_biotype:protein_coding transcript_biotype:protein_coding	2
tae-miR396b	TraesCS6A01G268200.1	3.5	-1	1	21	805	825	UUCCACAGCUUUCUUGAACUU	::: : .::.:::.:::::::	AAGCUGGAGGAAGUUGUGGAA	Cleavage	cdna chromosome:IWGSC:6A:494470997:494474534:1 gene:TraesCS6A01G268200 gene_biotype:protein_coding transcript_biotype:protein_coding	2
tae-miR396b	TraesCS6A01G268200.2	3.5	-1	1	21	805	825	UUCCACAGCUUUCUUGAACUU	::: : .::.:::.:::::::	AAGCUGGAGGAAGUUGUGGAA	Cleavage	cdna chromosome:IWGSC:6A:494470997:494474534:1 gene:TraesCS6A01G268200 gene_biotype:protein_coding transcript_biotype:protein_coding	1
tae-miR396b	TraesCS1A01G120100.4	3.5	-1	1	21	1753	1773	UUCCACAGCUUUCUUGAACUU	.:::: .:::::::::: ::.	GAGUUGGAGAAAGCUGUUGAG	Cleavage	cdna chromosome:IWGSC:1A:132481070:132485645:1 gene:TraesCS1A01G120100 gene_biotype:protein_coding transcript_biotype:protein_coding	1
tae-miR396b	TraesCS2A01G567800.1	3.5	-1	1	21	1171	1191	UUCCACAGCUUUCUUGAACUU	.::: ..::.:.:.:::::::	GAGUAUGAGGAGGUUGUGGAA	Cleavage	cdna chromosome:IWGSC:2A:766464495:766469685:-1 gene:TraesCS2A01G567800 gene_biotype:protein_coding transcript_biotype:protein_coding	1
tae-miR396b	TraesCS3B01G339400.1	4	-1	1	21	958	978	UUCCACAGCUUUCUUGAACUU	::::::.::::::: ::::.	AAGUUCGAGAAAGCCAUGGAG	Cleavage	cdna chromosome:IWGSC:3B:545384103:545385316:1 gene:TraesCS3B01G339400 gene_biotype:protein_coding transcript_biotype:protein_coding	1
tae-miR396b	TraesCS3D01G305300.1	4	-1	1	21	961	981	UUCCACAGCUUUCUUGAACUU	::::::.::::::: ::::.	AAGUUCGAGAAAGCCAUGGAG	Cleavage	cdna chromosome:IWGSC:3D:419463907:419465140:1 gene:TraesCS3D01G305300 gene_biotype:protein_coding transcript_biotype:protein_coding	1
tae-miR396b	TraesCS3D01G305100.1	4	-1	1	21	961	981	UUCCACAGCUUUCUUGAACUU	::::::.::::::: ::::.	AAGUUCGAGAAAGCCAUGGAG	Cleavage	cdna chromosome:IWGSC:3D:418890995:418892150:1 gene:TraesCS3D01G305100 gene_biotype:protein_coding transcript_biotype:protein_coding	1
tae-miR396b	TraesCS3A01G297200.1	4	-1	1	21	964	984	UUCCACAGCUUUCUUGAACUU	::::::.::::::: ::::.	AAGUUCGAGAAAGCCAUGGAG	Cleavage	cdna chromosome:IWGSC:3A:531896270:531897423:-1 gene:TraesCS3A01G297200 gene_biotype:protein_coding transcript_biotype:protein_coding	1
tae-miR396b	TraesCS3D01G305000.1	4	-1	1	21	1052	1072	UUCCACAGCUUUCUUGAACUU	::::::.::::::: ::::.	AAGUUCGAGAAAGCCAUGGAG	Cleavage	cdna chromosome:IWGSC:3D:418875605:418876968:1 gene:TraesCS3D01G305000 gene_biotype:protein_coding transcript_biotype:protein_coding	1
tae-miR396b	TraesCS1B01G182400.1	4	-1	1	21	598	618	UUCCACAGCUUUCUUGAACUU	:::::.::::::::: : :.:	AAGUUUAAGAAAGCUCUUGGA	Cleavage	cdna chromosome:IWGSC:1B:329372861:329379594:1 gene:TraesCS1B01G182400 gene_biotype:protein_coding transcript_biotype:protein_coding	1
tae-miR396b	TraesCS2A01G410900.2	4	-1	1	21	1691	1712	UUCCACAGCUU-UCUUGAACUU	::::::::: ::::::::::	UAGUUCAAGACAAGCUGUGGAU	Translation	cdna chromosome:IWGSC:2A:668529879:668531999:-1 gene:TraesCS2A01G410900 gene_biotype:protein_coding transcript_biotype:protein_coding	1
tae-miR396b	TraesCS2D01G408300.2	4	-1	1	21	1691	1712	UUCCACAGCUU-UCUUGAACUU	::::::::: ::::::::::	UAGUUCAAGACAAGCUGUGGAU	Translation	cdna chromosome:IWGSC:2D:523160871:523163017:1 gene:TraesCS2D01G408300 gene_biotype:protein_coding transcript_biotype:protein_coding	1
tae-miR396b	TraesCS2D01G408300.1	4	-1	1	21	1811	1832	UUCCACAGCUU-UCUUGAACUU	::::::::: ::::::::::	UAGUUCAAGACAAGCUGUGGAU	Translation	cdna chromosome:IWGSC:2D:523160871:523163017:1 gene:TraesCS2D01G408300 gene_biotype:protein_coding transcript_biotype:protein_coding	1
tae-miR396b	TraesCS2A01G410900.1	4	-1	1	21	1913	1934	UUCCACAGCUU-UCUUGAACUU	::::::::: ::::::::::	UAGUUCAAGACAAGCUGUGGAU	Translation	cdna chromosome:IWGSC:2A:668529639:668532101:-1 gene:TraesCS2A01G410900 gene_biotype:protein_coding transcript_biotype:protein_coding	1
tae-miR396b	TraesCS4A01G094800.2	4	-1	1	21	295	317	UUCCACAGCUUUCU--UGAACUU	::::::: ::..:::::::::.	AAGUUCAUGAGGGAGCUGUGGAG	Cleavage	cdna chromosome:IWGSC:4A:103075101:103083572:-1 gene:TraesCS4A01G094800 gene_biotype:protein_coding transcript_biotype:protein_coding	1
tae-miR396b	TraesCS4D01G210400.1	4	-1	1	21	295	317	UUCCACAGCUUUCU--UGAACUU	::::::: ::..:::::::::.	AAGUUCAUGAGGGAGCUGUGGAG	Cleavage	cdna chromosome:IWGSC:4D:362114349:362123933:1 gene:TraesCS4D01G210400 gene_biotype:protein_coding transcript_biotype:protein_coding	1
tae-miR396b	TraesCS4A01G094800.1	4	-1	1	21	405	427	UUCCACAGCUUUCU--UGAACUU	::::::: ::..:::::::::.	AAGUUCAUGAGGGAGCUGUGGAG	Cleavage	cdna chromosome:IWGSC:4A:103074747:103083682:-1 gene:TraesCS4A01G094800 gene_biotype:protein_coding transcript_biotype:protein_coding	1
tae-miR396b	TraesCS7D01G509200.1	4	-1	1	21	655	675	UUCCACAGCUUUCUUGAACUU	.::::::::::. : :::::.	GAGUUCAAGAAGACGGUGGAG	Cleavage	cdna chromosome:IWGSC:7D:612779755:612780465:1 gene:TraesCS7D01G509200 gene_biotype:protein_coding transcript_biotype:protein_coding	1
tae-miR396b	TraesCS7D01G230700.1	4	-1	1	21	742	762	UUCCACAGCUUUCUUGAACUU	:.::::.:::..:. ::::.:	AGGUUCGAGAGGGUGGUGGGA	Cleavage	cdna chromosome:IWGSC:7D:191795814:191796746:-1 gene:TraesCS7D01G230700 gene_biotype:protein_coding transcript_biotype:protein_coding	1
tae-miR396b	TraesCS7A01G230000.1	4	-1	1	21	754	774	UUCCACAGCUUUCUUGAACUU	:.::::.:::..:. ::::.:	AGGUUCGAGAGGGUGGUGGGA	Cleavage	cdna chromosome:IWGSC:7A:200509390:200510353:-1 gene:TraesCS7A01G230000 gene_biotype:protein_coding transcript_biotype:protein_coding	1
tae-miR396b	TraesCS7B01G195900.1	4	-1	1	21	766	786	UUCCACAGCUUUCUUGAACUU	:.::::.:::..:. ::::.:	AGGUUCGAGAGGGUGGUGGGA	Cleavage	cdna chromosome:IWGSC:7B:337023639:337024595:-1 gene:TraesCS7B01G195900 gene_biotype:protein_coding transcript_biotype:protein_coding	1
tae-miR396b	TraesCS6A01G103400.1	4	-1	1	21	673	693	UUCCACAGCUUUCUUGAACUU	.::::::::: .::: ::::.	GAGUUCAAGACGGCUCUGGAG	Translation	cdna chromosome:IWGSC:6A:72443885:72446286:-1 gene:TraesCS6A01G103400 gene_biotype:protein_coding transcript_biotype:protein_coding	1
tae-miR396b	TraesCS3A01G311300.1	4	-1	1	21	1159	1179	UUCCACAGCUUUCUUGAACUU	:.:::::::::.:::: : .:	AGGUUCAAGAAGGCUGGGAGA	Cleavage	cdna chromosome:IWGSC:3A:550413905:550422755:-1 gene:TraesCS3A01G311300 gene_biotype:protein_coding transcript_biotype:protein_coding	1
tae-miR396b	TraesCS6A01G121400.2	4	-1	1	21	1006	1026	UUCCACAGCUUUCUUGAACUU	:.:::::.:: . ::::::::	AGGUUCAGGAUGUCUGUGGAA	Translation	cdna chromosome:IWGSC:6A:93798771:93801476:1 gene:TraesCS6A01G121400 gene_biotype:protein_coding transcript_biotype:protein_coding	1
tae-miR396b	TraesCS2B01G429800.1	4	-1	1	21	1715	1736	UUCCACAGCUU-UCUUGAACUU	.:::::::: ::::::::::	UGGUUCAAGACAAGCUGUGGAU	Translation	cdna chromosome:IWGSC:2B:617140832:617142969:1 gene:TraesCS2B01G429800 gene_biotype:protein_coding transcript_biotype:protein_coding	1
tae-miR396b	TraesCS2B01G429800.2	4	-1	1	21	1811	1832	UUCCACAGCUU-UCUUGAACUU	.:::::::: ::::::::::	UGGUUCAAGACAAGCUGUGGAU	Translation	cdna chromosome:IWGSC:2B:617140832:617142969:1 gene:TraesCS2B01G429800 gene_biotype:protein_coding transcript_biotype:protein_coding	1
tae-miR396b	TraesCS5D01G270900.1	4	-1	1	21	976	996	UUCCACAGCUUUCUUGAACUU	.::::..::::.: :::::..	GAGUUUGAGAAGGGUGUGGGG	Cleavage	cdna chromosome:IWGSC:5D:374603877:374607344:1 gene:TraesCS5D01G270900 gene_biotype:protein_coding transcript_biotype:protein_coding	1
tae-miR396b	TraesCS4B01G217600.1	4	-1	1	21	1102	1122	UUCCACAGCUUUCUUGAACUU	.::::::::: ::.:: :::.	GAGUUCAAGAUAGUUGAGGAG	Translation	cdna chromosome:IWGSC:4B:459067168:459073089:1 gene:TraesCS4B01G217600 gene_biotype:protein_coding transcript_biotype:protein_coding	1
tae-miR396b	TraesCS4D01G218000.1	4	-1	1	21	1108	1128	UUCCACAGCUUUCUUGAACUU	.::::::::: ::.:: :::.	GAGUUCAAGAUAGUUGAGGAG	Translation	cdna chromosome:IWGSC:4D:373640115:373643860:-1 gene:TraesCS4D01G218000 gene_biotype:protein_coding transcript_biotype:protein_coding	1
tae-miR396b	TraesCS5D01G270900.2	4	-1	1	21	1045	1065	UUCCACAGCUUUCUUGAACUU	.::::..::::.: :::::..	GAGUUUGAGAAGGGUGUGGGG	Cleavage	cdna chromosome:IWGSC:5D:374603877:374607344:1 gene:TraesCS5D01G270900 gene_biotype:protein_coding transcript_biotype:protein_coding	1
tae-miR396b	TraesCS6A01G121400.1	4	-1	1	21	1251	1271	UUCCACAGCUUUCUUGAACUU	:.:::::.:: . ::::::::	AGGUUCAGGAUGUCUGUGGAA	Translation	cdna chromosome:IWGSC:6A:93797168:93801706:1 gene:TraesCS6A01G121400 gene_biotype:protein_coding transcript_biotype:protein_coding	1
tae-miR396b	TraesCS6B01G387000.1	4	-1	1	21	2122	2142	UUCCACAGCUUUCUUGAACUU	::: :..::.::::::: :::	AAGGUUGAGGAAGCUGUUGAA	Cleavage	cdna chromosome:IWGSC:6B:661851365:661859387:1 gene:TraesCS6B01G387000 gene_biotype:protein_coding transcript_biotype:protein_coding	1
tae-miR396b	TraesCS4A01G086800.1	4	-1	1	21	1174	1194	UUCCACAGCUUUCUUGAACUU	.::::::::: ::.:: :::.	GAGUUCAAGAUAGUUGAGGAG	Translation	cdna chromosome:IWGSC:4A:90886355:90890420:-1 gene:TraesCS4A01G086800 gene_biotype:protein_coding transcript_biotype:protein_coding	1
tae-miR396b	TraesCS4B01G217700.1	4.5	-1	1	21	1507	1527	UUCCACAGCUUUCUUGAACUU	:::::.: :.:::::::::	AAGUUUAUGGAAGCUGUGGUG	Cleavage	cdna chromosome:IWGSC:4B:459073746:459075725:-1 gene:TraesCS4B01G217700 gene_biotype:protein_coding transcript_biotype:protein_coding	1
tae-miR396b	TraesCS3B01G557400.1	4.5	-1	1	21	175	195	UUCCACAGCUUUCUUGAACUU	:::::::.:.:::::: ::.	AAGUUCAGGGAAGCUGGUGAG	Cleavage	cdna chromosome:IWGSC:3B:791653197:791653814:1 gene:TraesCS3B01G557400 gene_biotype:protein_coding transcript_biotype:protein_coding	1
tae-miR396b	TraesCS4A01G235800.1	4.5	-1	1	21	970	990	UUCCACAGCUUUCUUGAACUU	::::::.:::.::: ::::.	AAGUUCGAGAGAGCCAUGGAG	Cleavage	cdna chromosome:IWGSC:4A:544380953:544382209:1 gene:TraesCS4A01G235800 gene_biotype:protein_coding transcript_biotype:protein_coding	1
tae-miR396b	TraesCS5D01G364600.1	4.5	-1	1	21	979	999	UUCCACAGCUUUCUUGAACUU	::::::.:::.::: ::::.	AAGUUCGAGAGAGCCAUGGAG	Cleavage	cdna chromosome:IWGSC:5D:442010787:442011960:-1 gene:TraesCS5D01G364600 gene_biotype:protein_coding transcript_biotype:protein_coding	1
tae-miR396b	TraesCS3A01G297300.1	4.5	-1	1	21	985	1005	UUCCACAGCUUUCUUGAACUU	::::::.:::.::: ::::.	AAGUUCGAGAGAGCCAUGGAG	Cleavage	cdna chromosome:IWGSC:3A:531943662:531944857:-1 gene:TraesCS3A01G297300 gene_biotype:protein_coding transcript_biotype:protein_coding	1
tae-miR396b	TraesCS7B01G376000.1	4.5	-1	1	21	994	1014	UUCCACAGCUUUCUUGAACUU	::::::.:::.::: ::::.	AAGUUCGAGAGAGCCAUGGAG	Cleavage	cdna chromosome:IWGSC:7B:641141369:641142629:1 gene:TraesCS7B01G376000 gene_biotype:protein_coding transcript_biotype:protein_coding	1
tae-miR396b	TraesCS7A01G474400.1	4.5	-1	1	21	994	1014	UUCCACAGCUUUCUUGAACUU	::::::.:::.::: ::::.	AAGUUCGAGAGAGCCAUGGAG	Cleavage	cdna chromosome:IWGSC:7A:669771514:669772770:1 gene:TraesCS7A01G474400 gene_biotype:protein_coding transcript_biotype:protein_coding	1
tae-miR396b	TraesCS2B01G275000.1	4.5	-1	1	21	249	269	UUCCACAGCUUUCUUGAACUU	:::::::.:.:::.:: :::	AAGUUCAGGGAAGUUGAAGAA	Cleavage	cdna chromosome:IWGSC:2B:379095305:379104481:-1 gene:TraesCS2B01G275000 gene_biotype:protein_coding transcript_biotype:protein_coding	1
tae-miR396b	TraesCS3A01G297100.1	4.5	-1	1	21	1001	1021	UUCCACAGCUUUCUUGAACUU	::::::.::::::. ::::.	AAGUUCGAGAAAGUCAUGGAG	Cleavage	cdna chromosome:IWGSC:3A:531701229:531702627:-1 gene:TraesCS3A01G297100 gene_biotype:protein_coding transcript_biotype:protein_coding	1
tae-miR396b	TraesCS6D01G178100.1	4.5	-1	1	21	928	948	UUCCACAGCUUUCUUGAACUU	::::::::::.::::: :	CAGUUCAAGAAGGCUGUUGUG	Cleavage	cdna chromosome:IWGSC:6D:183953502:183955118:-1 gene:TraesCS6D01G178100 gene_biotype:protein_coding transcript_biotype:protein_coding	2
tae-miR396b	TraesCS6D01G178100.1	4.5	-1	1	21	1464	1485	UUCCACAGCUUUCUUG-AACUU	:.::: ::.::::::::: :.:	AGGUUGCAGGAAAGCUGUAGGA	Cleavage	cdna chromosome:IWGSC:6D:183953502:183955118:-1 gene:TraesCS6D01G178100 gene_biotype:protein_coding transcript_biotype:protein_coding	2
tae-miR396b	TraesCS6B01G295400.2	4.5	-1	1	21	841	861	UUCCACAGCUUUCUUGAACUU	::: :: ::.:::.:: ::::	AAGCUCCAGGAAGUUGAGGAA	Cleavage	cdna chromosome:IWGSC:6B:530566191:530569701:1 gene:TraesCS6B01G295400 gene_biotype:protein_coding transcript_biotype:protein_coding	2
tae-miR396b	TraesCS6D01G246700.2	4.5	-1	1	21	835	855	UUCCACAGCUUUCUUGAACUU	::: :: ::.:::.:: ::::	AAGCUCCAGGAAGUUGAGGAA	Cleavage	cdna chromosome:IWGSC:6D:349918338:349921863:-1 gene:TraesCS6D01G246700 gene_biotype:protein_coding transcript_biotype:protein_coding	2
tae-miR396b	TraesCS6A01G268200.1	4.5	-1	1	21	835	855	UUCCACAGCUUUCUUGAACUU	::: :: ::.:::.:: ::::	AAGCUCCAGGAAGUUGAGGAA	Cleavage	cdna chromosome:IWGSC:6A:494470997:494474534:1 gene:TraesCS6A01G268200 gene_biotype:protein_coding transcript_biotype:protein_coding	2
tae-miR396b	TraesCS2D01G075800.1	4.5	-1	1	21	2344	2364	UUCCACAGCUUUCUUGAACUU	:::::..::::: .:::: ::	AAGUUUGAGAAACUUGUGAAA	Cleavage	cdna chromosome:IWGSC:2D:32472553:32481888:-1 gene:TraesCS2D01G075800 gene_biotype:protein_coding transcript_biotype:protein_coding	1
tae-miR396b	TraesCS3D01G309900.3	4.5	-1	1	21	2277	2297	UUCCACAGCUUUCUUGAACUU	:::::..::.:::::: :::	AAGUUUGAGGAAGCUGGAGAA	Cleavage	cdna chromosome:IWGSC:3D:424008960:424011923:1 gene:TraesCS3D01G309900 gene_biotype:protein_coding transcript_biotype:protein_coding	1
tae-miR396b	TraesCS3D01G309900.2	4.5	-1	1	21	2301	2321	UUCCACAGCUUUCUUGAACUU	:::::..::.:::::: :::	AAGUUUGAGGAAGCUGGAGAA	Cleavage	cdna chromosome:IWGSC:3D:424008960:424011923:1 gene:TraesCS3D01G309900 gene_biotype:protein_coding transcript_biotype:protein_coding	1
tae-miR396b	TraesCS3B01G343400.2	4.5	-1	1	21	2280	2300	UUCCACAGCUUUCUUGAACUU	:::::..::.:::::: :::	AAGUUUGAGGAAGCUGGAGAA	Cleavage	cdna chromosome:IWGSC:3B:552229984:552232972:-1 gene:TraesCS3B01G343400 gene_biotype:protein_coding transcript_biotype:protein_coding	1
tae-miR396b	TraesCS3A01G321400.2	4.5	-1	1	21	2289	2309	UUCCACAGCUUUCUUGAACUU	:::::..::.:::::: :::	AAGUUUGAGGAAGCUGGAGAA	Cleavage	cdna chromosome:IWGSC:3A:564943513:564946489:-1 gene:TraesCS3A01G321400 gene_biotype:protein_coding transcript_biotype:protein_coding	1
tae-miR396b	TraesCS3B01G343400.1	4.5	-1	1	21	2292	2312	UUCCACAGCUUUCUUGAACUU	:::::..::.:::::: :::	AAGUUUGAGGAAGCUGGAGAA	Cleavage	cdna chromosome:IWGSC:3B:552229984:552232960:-1 gene:TraesCS3B01G343400 gene_biotype:protein_coding transcript_biotype:protein_coding	1
tae-miR396b	TraesCS3A01G321400.1	4.5	-1	1	21	2292	2312	UUCCACAGCUUUCUUGAACUU	:::::..::.:::::: :::	AAGUUUGAGGAAGCUGGAGAA	Cleavage	cdna chromosome:IWGSC:3A:564943513:564946489:-1 gene:TraesCS3A01G321400 gene_biotype:protein_coding transcript_biotype:protein_coding	1
tae-miR396b	TraesCS3B01G343400.3	4.5	-1	1	21	2307	2327	UUCCACAGCUUUCUUGAACUU	:::::..::.:::::: :::	AAGUUUGAGGAAGCUGGAGAA	Cleavage	cdna chromosome:IWGSC:3B:552229984:552232972:-1 gene:TraesCS3B01G343400 gene_biotype:protein_coding transcript_biotype:protein_coding	1
tae-miR396b	TraesCS6B01G073800.1	5	-1	1	21	913	933	UUCCACAGCUUUCUUGAACUU	::::::.::::::.::::	AAGUUCGAGAAAGUUGUGCUC	Cleavage	cdna chromosome:IWGSC:6B:50122210:50124324:1 gene:TraesCS6B01G073800 gene_biotype:protein_coding transcript_biotype:protein_coding	1
tae-miR396b	TraesCS1D01G008200.1	5	-1	1	21	118	138	UUCCACAGCUUUCUUGAACUU	:: :::::::::::::::	AACUUCAAGAAAGCUGUGCGG	Cleavage	cdna chromosome:IWGSC:1D:4179450:4188321:-1 gene:TraesCS1D01G008200 gene_biotype:protein_coding transcript_biotype:protein_coding	1
tae-miR396b	TraesCS1B01G014400.1	5	-1	1	21	167	187	UUCCACAGCUUUCUUGAACUU	:: :::::::::::::::	AACUUCAAGAAAGCUGUGCGG	Cleavage	cdna chromosome:IWGSC:1B:7032910:7039539:-1 gene:TraesCS1B01G014400 gene_biotype:protein_coding transcript_biotype:protein_coding	1
tae-miR396b	TraesCS5B01G278700.1	5	-1	1	21	211	231	UUCCACAGCUUUCUUGAACUU	:::::::::::. .:::::	AAGUUCAAGAAGUUUGUGGUG	Cleavage	cdna chromosome:IWGSC:5B:464364270:464365800:-1 gene:TraesCS5B01G278700 gene_biotype:protein_coding transcript_biotype:protein_coding	1
tae-miR396b	TraesCS5A01G279400.1	5	-1	1	21	247	267	UUCCACAGCUUUCUUGAACUU	:::::::::::. .:::::	AAGUUCAAGAAGUUUGUGGUU	Cleavage	cdna chromosome:IWGSC:5A:488315727:488317551:-1 gene:TraesCS5A01G279400 gene_biotype:protein_coding transcript_biotype:protein_coding	1
tae-miR396b	TraesCS5D01G286400.1	5	-1	1	21	244	264	UUCCACAGCUUUCUUGAACUU	:::::::::::. .:::::	AAGUUCAAGAAGUUUGUGGUG	Cleavage	cdna chromosome:IWGSC:5D:386686889:386688753:-1 gene:TraesCS5D01G286400 gene_biotype:protein_coding transcript_biotype:protein_coding	1
