# Supplementary material for: Tae-miR396b regulates TaGRFs in spikes of three wheat spike mutants
Source: PeerJ. 2024 Nov 22;12:e18550. doi: 10.7717/peerj.18550 (PMC11587873; doi:10.7717/peerj.18550)
Supplement: Supplemental Information 3 [file peerj-12-18550-s003.xlsx]

## Sheet: Sheet1
	tpm	SEM	tpm	SEM	tpm	SEM	tpm	SEM	tpm	SEM	tpm	SEM	tpm	SEM	tpm	SEM	tpm	SEM	tpm	SEM	tpm	SEM	tpm	SEM	tpm	SEM	tpm	SEM	tpm	SEM	tpm	SEM	tpm	SEM	tpm	SEM	tpm	SEM	tpm	SEM	tpm	SEM	tpm	SEM	tpm	SEM	tpm	SEM	tpm
roots, reproductive, none, Chinese Spring(n=2)	2.55886	2.09216	2.4932	1.53361	2.34567	1.0074	0	0	0	0	0	0	0	0	0	0	0	0	0	0	0	0	0	0	0	0	1.47583	0.430139	2.21494	1.15942	1.75962	0.918508	2.77763	2.071	2.90729	2.13218	2.94658	2.12579	0.814464	0	0.946334	0	0	0	0.260664	0	0	0	3.35537
roots, vegetative, none, Chinese Spring(n=22)	2.30919	0.707871	1.98292	0.530583	1.89199	0.383949	0	0	0	0	0	0	0	0	0	0	0	0	0	0	0	0	0	0	0	0	1.52257	0.049361	1.83765	0.048209	1.81954	0.282805	3.09962	1.19417	3.11458	1.45656	3.00677	1.26973	1.06801	0	1.25198	0	0	0	0	0	0	0	3.39701
leaves/shoots, reproductive, none, Chinese Spring(n=10)	0	0	0	0	0	0	0	0	0	0	0	0	0	0	0	0	1.06098	0.531156	0.722766	0.176021	0	0	0	0	0	0	0.36704	0	0.63828	0	0.842955	0	0	0	0	0	0	0	0	0	0	0	0	0	0	0	0	0	3.19431
leaves/shoots, vegetative, none, Chinese Spring(n=36)	0.133972	1.59461	0.31001	1.59932	0.775893	2.15222	0	0	0	0	0	0	0	0	0	0.626576	1.1153	2.00003	1.02218	1.72946	0	0	0	0	0.589044	0.402866	0.609841	0.68659	0.732173	1.05082	0.741264	0.776939	0.473338	1.37519	0.326134	1.25989	0.316599	1.31764	0.626838	1.68406	0.805267	1.82156	0	0	0	0.342766	0	0.365192	3.26839
spike, vegetative, none, Chinese Spring(n=2)	3.33217	0.200706	3.75153	0.028771	4.06981	1.27985	0	0	2.52657	0.319251	1.84066	0	1.69728	0.021413	2.69183	0.812282	3.64175	1.57526	3.00556	1.03213	1.78879	0	2.86324	0.332752	2.54811	0	2.54121	1.26694	2.84821	1.27674	2.65508	1.24627	3.63257	2.10731	3.03232	1.12161	3.52819	1.11922	3.62161	1.76704	3.56422	1.75956	1.97795	0	1.84641	0.375639	2.51366	1.41616	4.08718
spike, reproductive, none, Chinese Spring(n=16)	1.23271	1.73305	1.79356	2.19634	1.77328	2.09703	0	0	0.732472	1.23494	0.181935	1.05478	0.068421	0.692214	0.715894	0.617935	2.04352	1.76575	1.44067	0.938836	0	0	0.591261	0.639723	0.558967	0.179164	0.89301	0	1.33652	0.359651	1.36453	0.857149	2.16305	2.38011	1.54824	1.73252	1.50771	1.58643	1.32647	0.582296	1.16189	0.832526	0	0	0	0	0	0	3.85252
grain, reproductive, none, Chinese Spring(n=37)	0	0	0	0	0	0	0	0	0	0	0	0	0	0	0	0	0	0	0	0	0	0	0	0	0	0	0	0	0	0	0	0	0.240568	1.34474	0.827317	1.62869	0.450034	1.10474	0	0	0	0	0	0	0	0	0	0	2.54661
[truncated: 71 more columns]

## Sheet: Sheet2
Table S5. The transcripts per million (TPM) values of the TaGRFs in roots, leaves and spikes of Chinese Spring at vegetative and reproductive stages
		roots, vegetative	roots, reproductive	leaves/shoots, vegetative	leaves/shoots, reproductive	spike, vegetative	spike, reproductive
Gene ID	Gene Name	V1	R1	V2	R2	V3	R3
TraesCS6A02G335900	TaGRF1-6A	2.30919	2.55886	0.133972	0	3.33217	1.23271
TraesCS6B02G366700	TaGRF1-6B	1.98292	2.4932	0.31001	0	3.75153	1.79356
TraesCS6D02G315700	TaGRF1-6D	1.89199	2.34567	0.775893	0	4.06981	1.77328
TraesCS7A02G165600	TaGRF2-7A	0	0	0	0	2.52657	0.732472
TraesCS7B02G070200	TaGRF2-7B	0	0	0	0	1.84066	0.181935
TraesCS7D02G166400	TaGRF2-7D	0	0	0	0	1.69728	0.068421
TraesCS2A02G435100	TaGRF3-2A	0	0	0	0	2.69183	0.715894
TraesCS2D02G435200	TaGRF3-2D	0	0	1.1153	1.06098	3.64175	2.04352
TraesCS2B02G458400	TaGRF4-2B	0	0	1.02218	0.722766	3.00556	1.44067
TraesCS6A02G269600	TaGRF4-6A	0	0	0	0	1.78879	0
TraesCS6B02G296900	TaGRF4-6B	0	0	0	0	2.86324	0.591261
TraesCS6D02G245300	TaGRF4-6D	0	0	0.589044	0	2.54811	0.558967
TraesCS4A02G434900	TaGRF5-4A	1.52257	1.47583	0.609841	0.36704	2.54121	0.89301
TraesCS7A02G049100	TaGRF5-7A	1.83765	2.21494	0.732173	0.63828	2.84821	1.33652
TraesCS7D02G044200	TaGRF5-7D	1.81954	1.75962	0.741264	0.842955	2.65508	1.36453
TraesCS4A02G255000	TaGRF6-4A	3.09962	2.77763	0.473338	0	3.63257	2.16305
TraesCS4B02G060000	TaGRF6-4B	3.11458	2.90729	0.326134	0	3.03232	1.54824
TraesCS4D02G059600	TaGRF6-4D	3.00677	2.94658	0.316599	0	3.52819	1.50771
TraesCS4A02G291500	TaGRF9-4A	1.06801	0.814464	0.626838	0	3.62161	1.32647
TraesCS4D02G020300	TaGRF9-4D	1.25198	0.946334	0.805267	0	3.56422	1.16189
TraesCS6A02G257600	TaGRF10-6A	0	0	0	0	1.97795	0
TraesCS6B02G267500	TaGRF10-6B	0	0.260664	0	0	1.84641	0
TraesCS6D02G238900	TaGRF10-6D	0	0	0	0	2.51366	0
